# Supplementary material
Source: PubMed Central journal article supplement (PMC4986619)
Supplement: supp_116.070300_Supplemental_70300_FInal.pdf [file supp_116.070300_Supplemental_70300_FInal.pdf]

## **Supplemental Data**

Transcriptional Regulation of SULT1C2 by Vitamin D Receptor in LS180 Human Colorectal Adenocarcinoma Cells

Kathleen G. Barrett, Hailin Fang, Thomas A. Kocarek, and Melissa Runge-Morris. Institute of Environmental Health Sciences, Wayne State University, Detroit, MI 48202 (K.G.B., H.F., T.A.K., M.R.-M.)

Drug Metabolism and Disposition

**Supplemental Table 1. PCR Primers and oligonucleotides used to prepare constructs and probes in this study.**

|                                                                            | Sequence                                                  | Comments                                                                                                         |
|----------------------------------------------------------------------------|-----------------------------------------------------------|------------------------------------------------------------------------------------------------------------------|
| <b>Primers to prepare SULT1C2 (-4998:-1)</b>                               |                                                           |                                                                                                                  |
| FOR                                                                        | 5' GGG <u>GGTACC</u> CAGGCAGCTGAGGGCCAGGA 3'              | KpnI site underscored.                                                                                           |
| REV                                                                        | 5' GGG <u>GCTAGC</u> AGTGTCTCAGGGTTGGGGTC 3'              | NheI site underscored.                                                                                           |
| <b>Primers to prepare SULT1C2 (-4827:-1) deletion construct</b>            |                                                           |                                                                                                                  |
| FOR                                                                        | 5' GGG <u>GGTACC</u> ACAGGGTTTGTCTGTTCAATCCG 3'           | KpnI site underscored.                                                                                           |
| REV                                                                        | 5' GGG <u>GCTAGC</u> AGTGTCTCAGGGTTGGGGTC 3'              | NheI site underscored; same REV primer for SULT1C2 (-4998:-1) (Rondini et al., 2014).                            |
| <b>Primers to prepare mutant VDRE SULT1C2</b>                              |                                                           |                                                                                                                  |
| FOR                                                                        | 5' TTGGTATTTGCACAGCAGTCAGTTGCACATGAGTGATCATGGTACAG 3'     | Mutated bases underscored.                                                                                       |
| REV                                                                        | 5' CTGTACCATGATCACTCATGTGCAACTGACTGCTGTGCAAATACCAA 3'     | Mutated bases underscored.                                                                                       |
| <b>Primers to prepare VDR expression plasmid</b>                           |                                                           |                                                                                                                  |
| FOR                                                                        | 5' GGG <u>AAGCTT</u> CCCCTGCTCCTTCAGGGATG 3'              | HindIII site underscored.                                                                                        |
| REV                                                                        | 5' GGG <u>CTCGAG</u> TCAGGAGATCTCATTGCCAAACACT 3'         | XhoI site underscored.                                                                                           |
| <b>Oligonucleotides for VDR-VDRE <i>In Vitro</i> Binding Assay</b>         |                                                           |                                                                                                                  |
| <b>Capture Probe: 5'-end biotin-modified consensus VDRE probe</b>          |                                                           |                                                                                                                  |
| Sense                                                                      | 5' TGGATGAGCGGAGCTGCCCTGCACTGGGTGAATGAGGACATTACTGACCG 3'  | VDRE consensus sequence (DR3) underscored. 5'-end biotin modification of sense strand.                           |
| Antisense                                                                  | 5' CGGTCAGTAATGTCCCTCATTCACCCAGTGCAGGGCAGCTCCGCTCATCCA 3' |                                                                                                                  |
| <b>Negative Probe: 5'-end biotin-modified mutated consensus VDRE probe</b> |                                                           |                                                                                                                  |
| Sense                                                                      | 5' TGGATGAGCGGAGCTGCCCTGCACTGtaTGAATGActACATTACTGACCG 3'  | Consensus VDRE sequence (DR3) underscored; mutated bases lower case. 5'-end biotin modification of sense strand. |
| Antisense                                                                  | 5' CGGTCAGTAATGTtagTCATTCAtaCAGTGCAGGGCAGCTCCGCTCATCCA 3' |                                                                                                                  |
| <b>Competitor 1: Consensus VDRE probe</b>                                  |                                                           |                                                                                                                  |
| Sense                                                                      | 5' GCCCTGCACTGGGTGAATGAGGACATTACTGACCG 3'                 | Consensus VDRE sequence (DR3) underscored.                                                                       |
| Antisense                                                                  | 5' CGGTCAGTAATGTCCCTCATTCACCCAGTGCAGGGC 3'                |                                                                                                                  |
| <b>Competitor 2: Mutated consensus VDRE probe</b>                          |                                                           |                                                                                                                  |
| Sense                                                                      | 5' GCCCTGCACTGtaTGAATGActACATTACTGACCG 3'                 | Mutated consensus VDRE sequence (DR3) underscored; mutated bases lower case.                                     |
| Antisense                                                                  | 5' CGGTCAGTAATGTtagTCATTCAtaCAGTGCAGGGC 3'                |                                                                                                                  |
| <b>Competitor 3: SULT1C2 VDRE probe</b>                                    |                                                           |                                                                                                                  |
| Sense                                                                      | 5' ACAGCAGTCAGGGTCACATGAGTGATCATGGTACA 3'                 | Computationally predicted SULT1C2 PXRE core sequence underscored.                                                |
| Antisense                                                                  | 5' TGTACCATGATCACTCATGTGACCCTGACTGCTGT 3'                 |                                                                                                                  |
| <b>Competitor 4: SULT1C2 mutated VDRE probe</b>                            |                                                           |                                                                                                                  |
| Sense                                                                      | 5' ACAGCAGTCAGaacCACATGAGTGATCATGGTACA 3'                 | Computationally predicted PXRE core sequence underscored; mutated bases lower case.                              |
| Antisense                                                                  | 5' TGTACCATGATCACTCATGTGgttCTGACTGCTGT 3'                 |                                                                                                                  |
